# Supplementary material for: GSA: an independent development algorithm for calling copy number and detecting homologous recombination deficiency (HRD) from target capture sequencing
Source: PubMed Central journal article supplement (PMC8609767; doi:10.1186/s12859-021-04487-9), 2021-11-23
Supplement: 12859_2021_4487_MOESM1_ESM.pdf [file 12859_2021_4487_MOESM1_ESM.pdf]

### Supplementary Material Captions

Supplementary Fig. 1 The schematic diagram for tree recursion (TR) segmentation algorithm.

Supplementary Fig. 2 The bioinformation analysis flow chart of the GSA algorithm.

Supplementary Fig. 3 The ROC curve modelled by 62 *BRCA1/2*-deficiency samples and 37 *BRCA1/2* wildtype clinical samples of the 195 patients.

Supplementary Fig. 4 The comparison diagram between before and after removing the abnormal segments according to BAF and LRR. (A) Before removing the abnormal segments according to BAF. (B) After removing the abnormal segments according to BAF. (C) Before removing the abnormal segments according to LRR. (D) After removing the abnormal segments according to LRR.

Supplementary Fig. 5 The consistency of HRD score calculated by the GSA algorithm with different purity for 3 cell lines (A) and 4 clinical samples (B).

Supplementary Fig. 6 The BAF and CN mapping of HCC38 with high HRD score.

Supplementary Fig. 7 The BAF and CN mapping of ZR-75-30 with low HRD score.

Supplementary Fig. 8 The waterfall map of 15 HRR pathway genes that mutated in the 195 clinical samples. The annotation of mutation types was shown on the upper right with various colors. The samples were sorted by HRD scores.

Supplementary Fig. 9 The chromosome segmentation effects comparison of GSA, PureCN and ASCAT algorithms in chromosome 2.

Supplementary Table 1 The relationship between theoretical copy number with tumor purity at specific genotype.

Supplementary Table 2 The relationship between theoretical BAF with tumor purity at specific genotype.

Supplementary Table 3 The HRD score and BRCA1/2 deficiency status of 195 clinical samples.

Supplementary Table 4 Tumor purity and ploidy values calculated by clinical samples and tumor cell lines with different tumor purity.

Supplementary Table 5 Comparison of the chromosome segmentation and copy number of GSA, PureCN, and ASCAT.

Supplementary Table 6 Comparison of the tumor purity and ploidy predicted by GSA, PureCN, and ASCAT.

Supplementary Fig. 1 The schematic diagram for tree recursion (TR) segmentation algorithm.

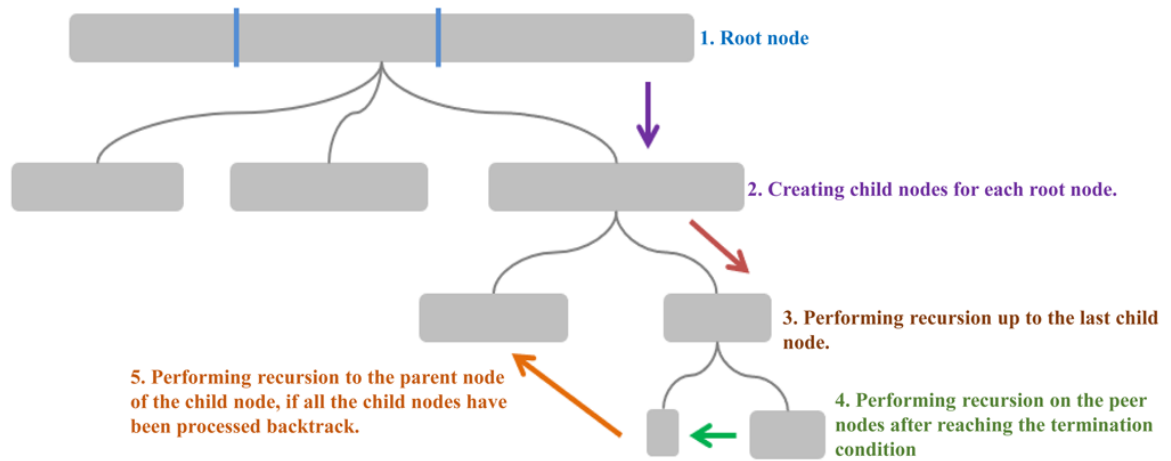

Supplementary Fig. 2 The bioinformatics analysis flow chart of the GSA algorithm.

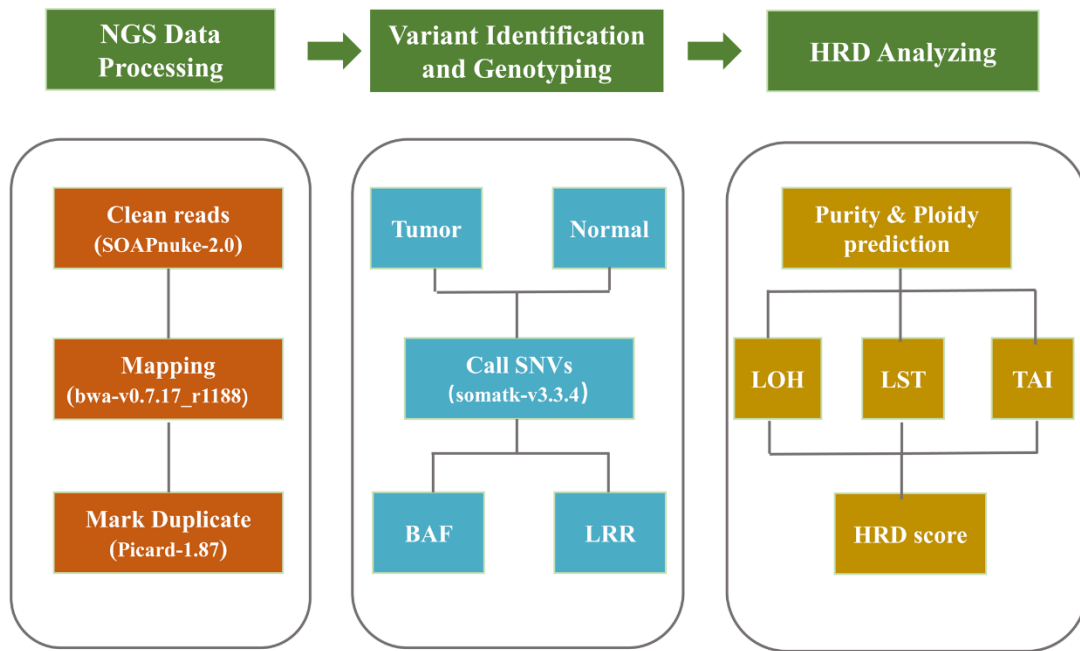

Supplementary Fig. 9 The ROC curve modelled by 62 *BRCA1/2*-deficiency samples and 37 *BRCA1/2* wildtype clinical samples of the 195 patients.

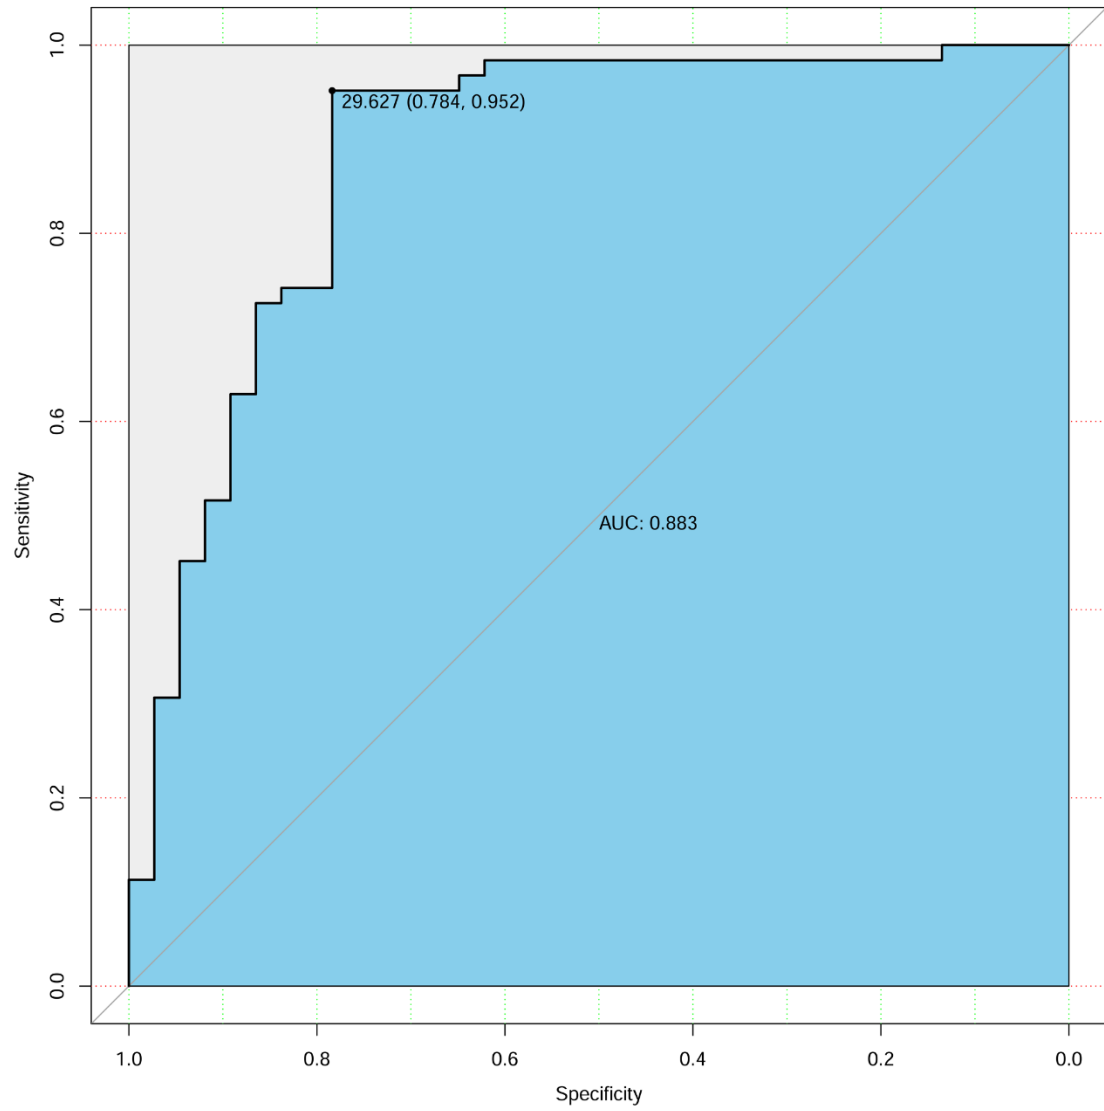

Supplementary Fig. 4 The comparison diagram between before and after removing the abnormal segments according to BAF and LRR. (A) Before removing the abnormal segments according to BAF. (B) After removing the abnormal segments according to BAF. (C) Before removing the abnormal segments according to LRR. (D) After removing the abnormal segments according to LRR.

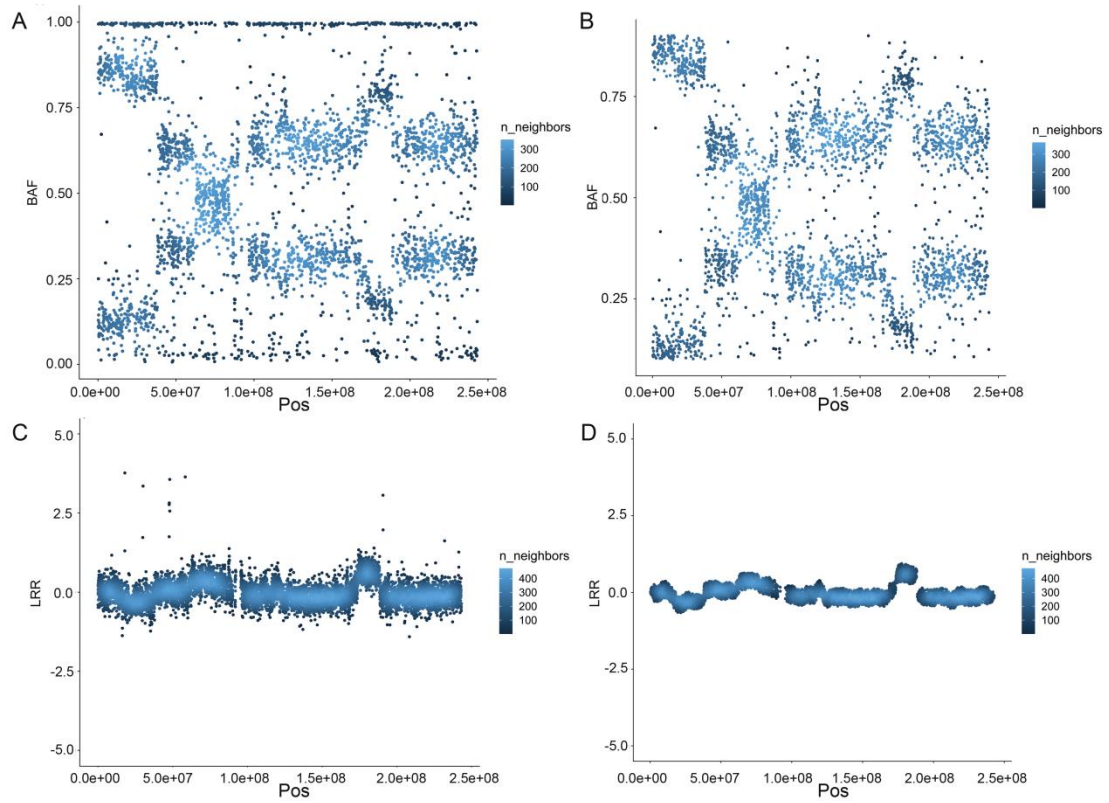

Supplementary Fig. 5 The consistency of HRD score calculated by the GSA algorithm with different purity for 3 cell lines (A) and 4 clinical samples (B).

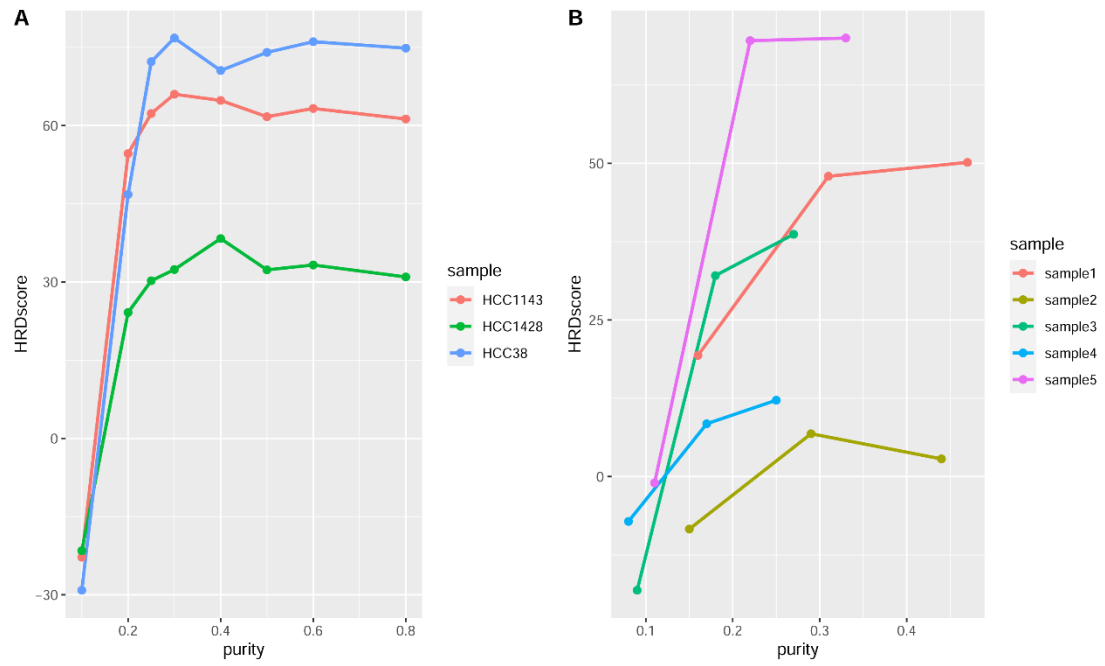

Supplementary Fig. 6 The BAF and CN mapping of HCC38 with high HRD score.

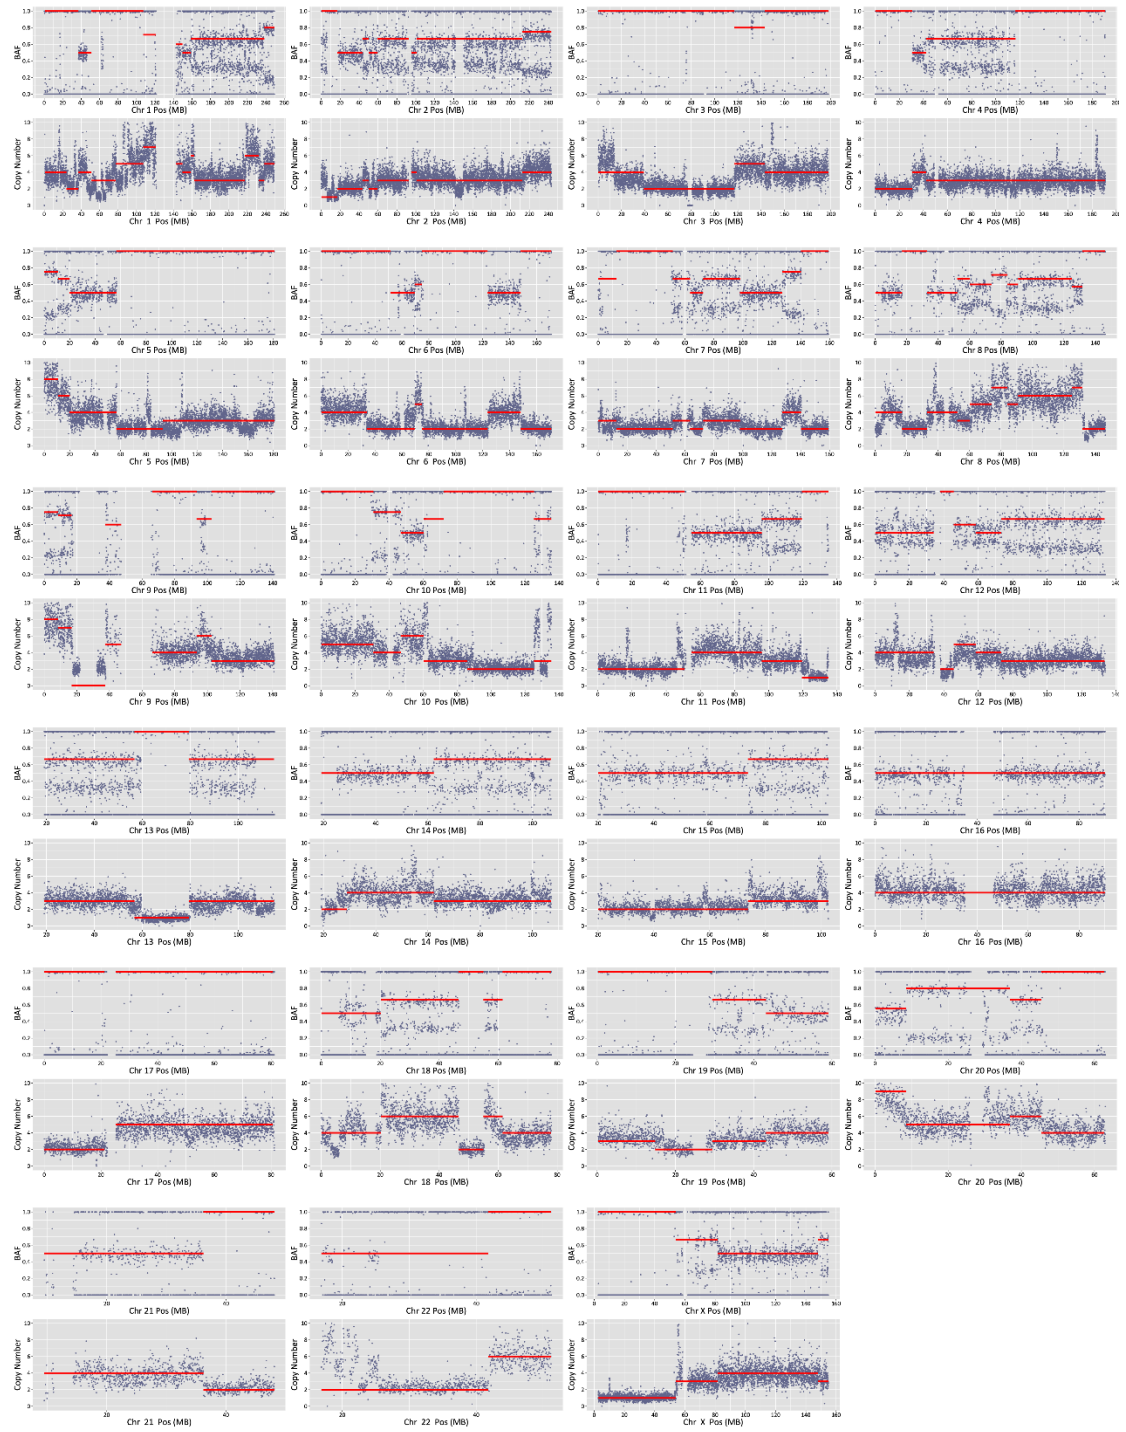



Supplementary Fig.7 The BAF and CN mapping of ZR-75-30 with low HRD score.

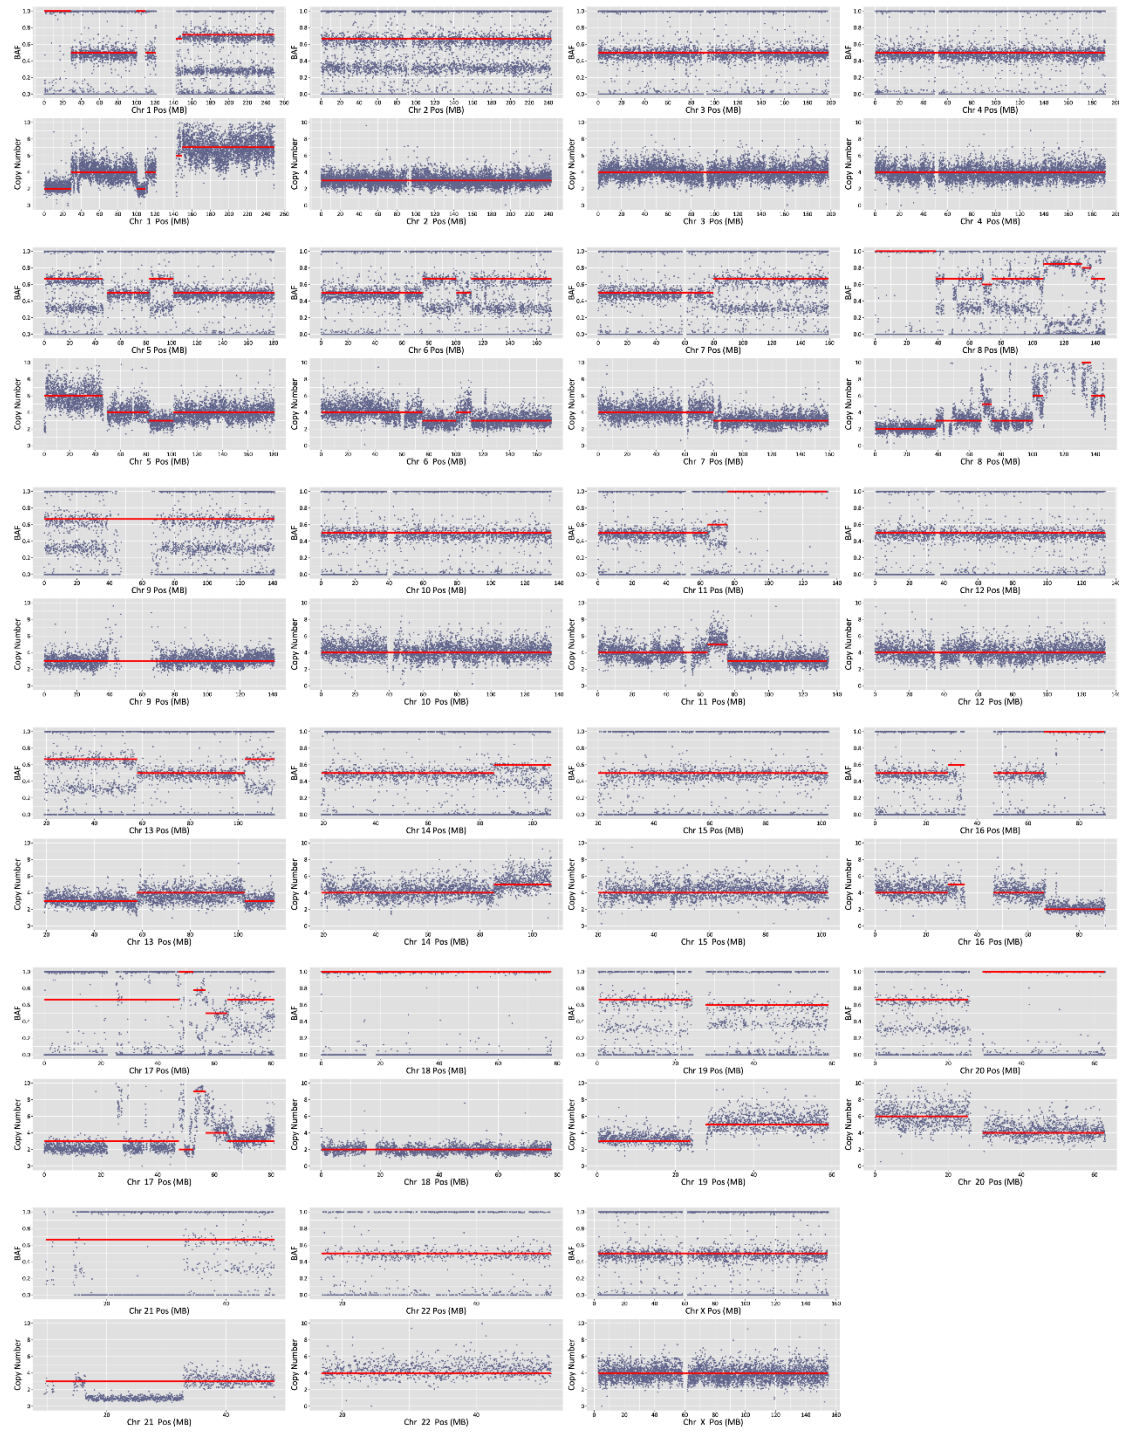

Supplementary Fig. 8 The waterfall map of 15 HRR pathway genes that mutated in the 195 clinical samples. The annotation of mutation types was shown on the upper right with various colors. The samples were sorted by HRD scores.

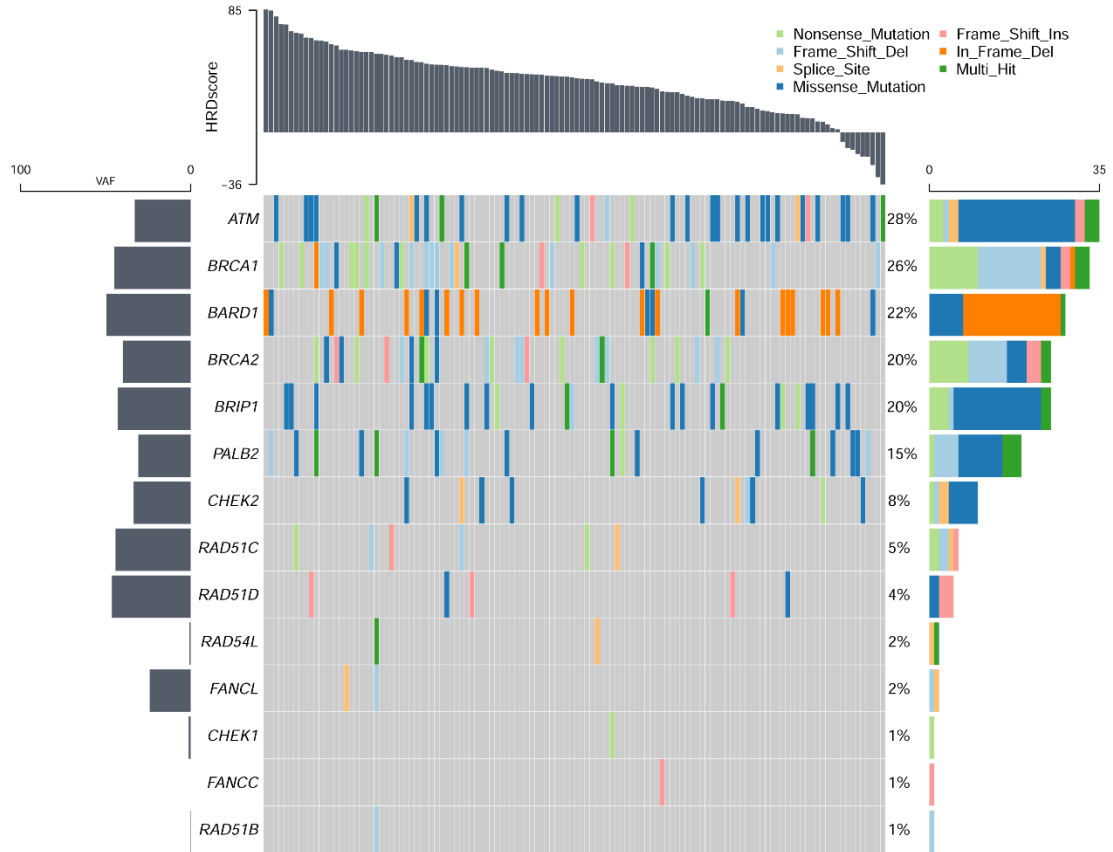

Supplementary Fig. 9 The chromosome segmentation effects comparison of GSA, PureCN and ASCAT algorithms in chromosome 2.

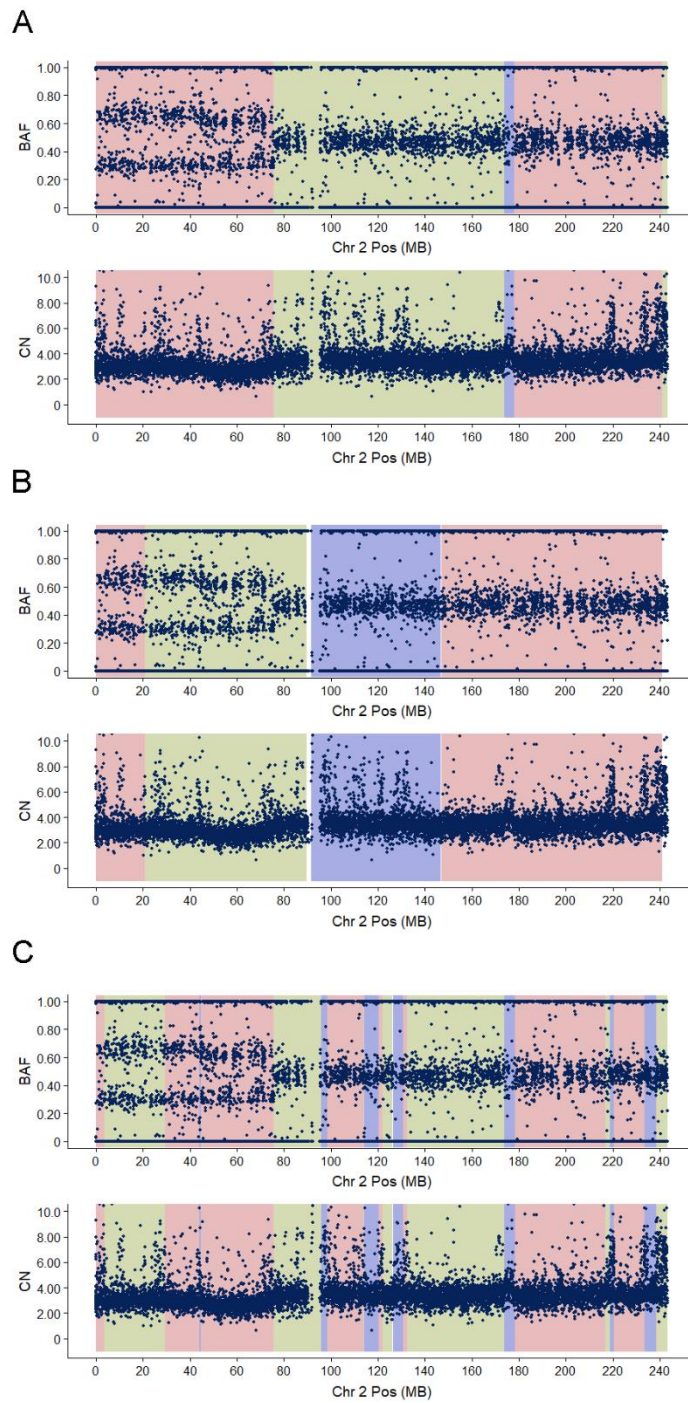

Supplementary Table 1 The relationship between theoretical copy number with different tumor purity at specific genotype.

| Tumor purity | Theoretical copy number of a specific genotype |     |     |     |     |      |      |      |       |       |       |
|--------------|------------------------------------------------|-----|-----|-----|-----|------|------|------|-------|-------|-------|
|              | B                                              | AB  | BB  | ABB | BBB | AABB | ABBB | BBBB | AABBB | ABBBB | BBBBB |
| 100%         | 1.0                                            | 2.0 | 2.0 | 2.0 | 3.0 | 4.0  | 4.0  | 4.0  | 5.0   | 5.0   | 5.0   |
| 80%          | 1.2                                            | 2.0 | 2.0 | 2.8 | 2.8 | 3.6  | 3.6  | 3.6  | 4.4   | 4.4   | 4.4   |
| 60%          | 1.4                                            | 2.0 | 2.0 | 2.6 | 2.6 | 3.2  | 3.2  | 3.2  | 3.8   | 3.8   | 3.8   |
| 40%          | 1.6                                            | 2.0 | 2.0 | 2.4 | 2.4 | 2.8  | 2.8  | 2.8  | 3.2   | 3.2   | 3.2   |
| 20%          | 1.8                                            | 2.0 | 2.0 | 2.2 | 2.2 | 2.4  | 2.4  | 2.4  | 2.6   | 2.6   | 2.6   |

Supplementary Table 2 The relationship between theoretical BAF with different tumor purity at specific genotype.

| Tumor purity | Theoretical BAF value of a specific genotype |      |      |      |      |      |      |      |       |       |       |
|--------------|----------------------------------------------|------|------|------|------|------|------|------|-------|-------|-------|
|              | B                                            | AB   | BB   | ABB  | BBB  | AABB | ABBB | BBBB | AABBB | ABBBB | BBBBB |
| 100%         | 1.00                                         | 0.50 | 1.00 | 0.67 | 1.00 | 0.50 | 0.75 | 1.00 | 0.60  | 0.80  | 1.00  |
| 80%          | 0.83                                         | 0.50 | 0.90 | 0.64 | 0.93 | 0.50 | 0.72 | 0.94 | 0.59  | 0.77  | 0.96  |
| 60%          | 0.71                                         | 0.50 | 0.80 | 0.62 | 0.85 | 0.50 | 0.69 | 0.88 | 0.58  | 0.74  | 0.90  |
| 40%          | 0.63                                         | 0.50 | 0.70 | 0.58 | 0.75 | 0.50 | 0.64 | 0.79 | 0.56  | 0.69  | 0.81  |
| 20%          | 0.56                                         | 0.50 | 0.60 | 0.55 | 0.64 | 0.50 | 0.58 | 0.67 | 0.54  | 0.62  | 0.69  |

Supplementary Table 3 The HRD score and *BRCA1/2* deficiency status of 195 clinical samples

| Sample | Cancer Type | Purity | LOH | TAI | LST | Ploidy | HRD Score | BRCA Deficiency Status |
|--------|-------------|--------|-----|-----|-----|--------|-----------|------------------------|
| S001   | OC          | 0.44   | 34  | 18  | 80  | 3.31   | 80.70     | N                      |
| S002   | OC          | 0.41   | 29  | 18  | 63  | 2.66   | 68.77     | Y                      |
| S003   | OC          | 0.75   | 31  | 20  | 42  | 1.95   | 62.78     | N                      |
| S004   | OC          | 0.69   | 33  | 18  | 41  | 1.92   | 62.24     | N                      |
| S005   | OC          | 0.79   | 22  | 19  | 71  | 3.23   | 61.94     | N                      |
| S006   | OC          | 0.53   | 19  | 19  | 76  | 3.64   | 57.58     | Y                      |
| S007   | OC          | 0.41   | 28  | 21  | 36  | 1.94   | 54.93     | N                      |
| S008   | OC          | 0.70   | 28  | 21  | 32  | 1.78   | 53.41     | N                      |
| S009   | OC          | 0.51   | 9   | 19  | 78  | 3.70   | 48.65     | N                      |
| S010   | OC          | 0.31   | 24  | 19  | 34  | 1.99   | 46.16     | N                      |
| S011   | OC          | 0.62   | 24  | 12  | 39  | 1.91   | 45.40     | N                      |
| S012   | OC          | 0.64   | 21  | 16  | 36  | 1.94   | 42.93     | N                      |
| S013   | OC          | 0.45   | 22  | 22  | 48  | 3.28   | 41.16     | Y                      |
| S014   | OC          | 0.53   | 13  | 16  | 60  | 3.12   | 40.64     | Y                      |
| S015   | OC          | 0.72   | 23  | 14  | 32  | 1.87   | 40.02     | Y                      |
| S016   | OC          | 0.46   | 17  | 9   | 62  | 3.14   | 39.33     | N                      |
| S017   | OC          | 0.83   | 20  | 16  | 32  | 1.88   | 38.86     | Y                      |
| S018   | OC          | 0.55   | 18  | 20  | 55  | 3.59   | 37.36     | Y                      |
| S019   | OC          | 0.37   | 23  | 18  | 43  | 3.04   | 36.88     | N                      |
| S020   | OC          | 0.67   | 19  | 16  | 29  | 2.03   | 32.54     | N                      |
| S021   | OC          | 0.70   | 14  | 18  | 53  | 3.39   | 32.46     | Y                      |
| S022   | OC          | 0.67   | 17  | 14  | 55  | 3.71   | 28.50     | N                      |
| S023   | OC          | 0.26   | 17  | 15  | 37  | 2.61   | 28.55     | N                      |
| S024   | OC          | 0.66   | 17  | 17  | 26  | 1.92   | 30.24     | Y                      |
| S025   | OC          | 0.58   | 16  | 14  | 24  | 1.81   | 25.95     | N                      |
| S026   | OC          | 0.43   | 7   | 18  | 57  | 3.66   | 25.27     | N                      |
| S027   | OC          | 0.88   | 15  | 19  | 29  | 2.01   | 31.84     | Y                      |
| S028   | OC          | 0.83   | 16  | 11  | 26  | 1.94   | 22.93     | N                      |
| S029   | OC          | 0.21   | 17  | 9   | 37  | 2.65   | 21.93     | N                      |
| S030   | OC          | 0.83   | 17  | 12  | 23  | 1.94   | 21.93     | Y                      |
| S031   | OC          | 0.79   | 18  | 11  | 23  | 1.94   | 21.93     | N                      |
| S032   | OC          | 0.68   | 18  | 8   | 25  | 2.01   | 19.85     | N                      |
| S033   | OC          | 0.67   | 18  | 11  | 35  | 2.92   | 18.74     | N                      |
| S034   | OC          | 0.65   | 15  | 7   | 21  | 1.69   | 16.81     | N                      |
| S035   | OC          | 0.39   | 13  | 9   | 24  | 2.06   | 14.07     | N                      |
| S036   | OC          | 0.77   | 6   | 15  | 35  | 2.84   | 11.98     | N                      |
| S037   | OC          | 0.83   | 5   | 2   | 6   | 1.91   | -16.61    | N                      |
| S038   | OC          | 0.43   | 4   | 2   | 10  | 2.12   | -16.86    | N                      |
| S039   | OC          | 0.34   | 2   | 1   | 8   | 2.33   | -25.12    | N                      |
| S040   | OC          | 1.00   | 0   | 0   | 0   | 2.00   | -31.00    | N                      |
| S041   | OC          | 0.78   | 29  | 24  | 75  | 2.75   | 85.38     | Y                      |

|      |    |      |    |    |    |      |       |   |
|------|----|------|----|----|----|------|-------|---|
| S042 | OC | 0.89 | 41 | 24 | 46 | 1.69 | 84.81 | Y |
| S043 | OC | 0.60 | 37 | 24 | 41 | 1.65 | 76.43 | Y |
| S044 | BC | 0.41 | 36 | 64 | 15 | 2.57 | 75.17 | N |
| S045 | OC | 0.56 | 34 | 19 | 64 | 2.71 | 75.00 | Y |
| S046 | OC | 0.63 | 34 | 49 | 17 | 1.90 | 70.55 | N |
| S047 | OC | 0.29 | 29 | 14 | 58 | 1.98 | 70.31 | Y |
| S048 | OC | 0.52 | 32 | 23 | 42 | 1.79 | 69.26 | Y |
| S049 | OC | 0.78 | 32 | 22 | 39 | 1.74 | 66.03 | N |
| S050 | OC | 0.70 | 27 | 23 | 57 | 2.66 | 65.77 | N |
| S051 | BC | 0.25 | 25 | 55 | 25 | 2.54 | 65.63 | N |
| S052 | BC | 0.60 | 25 | 64 | 24 | 3.16 | 64.02 | Y |
| S053 | OC | 0.56 | 29 | 58 | 7  | 1.94 | 63.93 | Y |
| S054 | OC | 0.79 | 34 | 21 | 35 | 1.69 | 63.81 | Y |
| S055 | OC | 0.59 | 24 | 22 | 66 | 3.16 | 63.02 | Y |
| S056 | OC | 0.65 | 26 | 11 | 86 | 3.97 | 61.47 | N |
| S057 | BC | 0.79 | 26 | 44 | 20 | 1.90 | 60.55 | Y |
| S058 | OC | 0.38 | 27 | 18 | 65 | 3.20 | 60.40 | Y |
| S059 | OC | 0.63 | 27 | 17 | 44 | 1.81 | 59.95 | N |
| S060 | OC | 0.45 | 29 | 17 | 38 | 1.71 | 57.50 | Y |
| S061 | OC | 0.29 | 25 | 19 | 61 | 3.06 | 57.57 | Y |
| S062 | BC | 0.69 | 30 | 33 | 18 | 1.55 | 56.98 | Y |
| S063 | OC | 0.64 | 25 | 20 | 62 | 3.25 | 56.63 | Y |
| S064 | OC | 0.67 | 31 | 16 | 54 | 2.90 | 56.05 | Y |
| S065 | BC | 0.20 | 29 | 48 | 13 | 2.20 | 55.90 | N |
| S066 | OC | 0.55 | 27 | 23 | 43 | 2.39 | 55.96 | N |
| S067 | OC | 0.78 | 24 | 19 | 47 | 2.28 | 54.66 | N |
| S068 | OC | 0.46 | 22 | 24 | 38 | 1.90 | 54.55 | Y |
| S069 | OC | 0.51 | 28 | 18 | 57 | 3.16 | 54.02 | N |
| S070 | OC | 0.74 | 23 | 18 | 40 | 1.75 | 53.88 | Y |
| S071 | OC | 0.50 | 25 | 15 | 44 | 1.99 | 53.16 | N |
| S072 | OC | 0.33 | 30 | 17 | 43 | 2.43 | 52.34 | Y |
| S073 | OC | 0.47 | 15 | 20 | 69 | 3.34 | 52.23 | Y |
| S074 | OC | 0.50 | 25 | 19 | 35 | 1.84 | 50.48 | N |
| S075 | OC | 0.80 | 24 | 14 | 44 | 2.05 | 50.23 | N |
| S076 | OC | 0.36 | 19 | 16 | 65 | 3.29 | 49.01 | N |
| S077 | BC | 0.64 | 26 | 38 | 15 | 1.95 | 48.78 | Y |
| S078 | OC | 0.53 | 24 | 14 | 38 | 1.77 | 48.57 | Y |
| S079 | OC | 0.82 | 24 | 18 | 34 | 1.79 | 48.26 | N |
| S080 | BC | 0.56 | 23 | 35 | 18 | 1.82 | 47.79 | Y |
| S081 | OC | 0.56 | 25 | 17 | 32 | 1.72 | 47.34 | Y |
| S082 | OC | 0.88 | 23 | 19 | 32 | 1.74 | 47.03 | Y |
| S083 | OC | 0.77 | 11 | 20 | 74 | 3.74 | 47.03 | N |
| S084 | OC | 0.37 | 25 | 19 | 32 | 1.88 | 46.86 | N |
| S085 | OC | 0.74 | 17 | 19 | 61 | 3.28 | 46.16 | Y |

|      |    |      |    |    |    |      |       |   |
|------|----|------|----|----|----|------|-------|---|
| S086 | OC | 0.73 | 25 | 16 | 38 | 2.14 | 45.83 | Y |
| S087 | OC | 0.74 | 27 | 14 | 37 | 2.08 | 45.76 | Y |
| S088 | OC | 0.76 | 24 | 14 | 34 | 1.72 | 45.34 | Y |
| S089 | BC | 0.33 | 26 | 31 | 13 | 1.61 | 45.05 | N |
| S090 | OC | 0.47 | 24 | 17 | 49 | 2.91 | 44.90 | Y |
| S091 | OC | 0.62 | 23 | 15 | 36 | 1.88 | 44.86 | N |
| S092 | OC | 0.32 | 24 | 19 | 45 | 2.79 | 44.76 | Y |
| S093 | OC | 0.62 | 23 | 12 | 37 | 1.82 | 43.79 | N |
| S094 | BC | 0.77 | 23 | 34 | 17 | 1.96 | 43.62 | Y |
| S095 | OC | 0.46 | 19 | 17 | 36 | 1.90 | 42.55 | N |
| S096 | OC | 0.37 | 21 | 18 | 51 | 3.12 | 41.64 | Y |
| S097 | OC | 0.83 | 23 | 12 | 34 | 1.77 | 41.57 | N |
| S098 | OC | 0.82 | 22 | 17 | 32 | 1.92 | 41.24 | N |
| S099 | OC | 0.66 | 19 | 17 | 49 | 2.86 | 40.67 | Y |
| S100 | OC | 0.24 | 24 | 16 | 36 | 2.30 | 40.35 | N |
| S101 | OC | 0.61 | 17 | 18 | 54 | 3.14 | 40.33 | Y |
| S102 | OC | 0.65 | 21 | 12 | 37 | 1.94 | 39.93 | N |
| S103 | OC | 0.86 | 22 | 16 | 29 | 1.77 | 39.57 | Y |
| S104 | OC | 0.66 | 22 | 20 | 46 | 3.15 | 39.18 | Y |
| S105 | BC | 0.44 | 23 | 26 | 17 | 1.76 | 38.72 | N |
| S106 | OC | 0.32 | 11 | 10 | 56 | 2.49 | 38.41 | Y |
| S107 | OC | 0.29 | 22 | 13 | 30 | 1.74 | 38.03 | N |
| S108 | OC | 0.79 | 23 | 20 | 37 | 2.72 | 37.84 | N |
| S109 | OC | 0.64 | 21 | 16 | 30 | 1.92 | 37.24 | N |
| S110 | OC | 0.70 | 19 | 16 | 29 | 1.75 | 36.88 | N |
| S111 | OC | 0.26 | 22 | 13 | 31 | 1.90 | 36.55 | N |
| S112 | OC | 0.56 | 21 | 15 | 27 | 1.72 | 36.34 | Y |
| S113 | OC | 0.54 | 13 | 19 | 42 | 2.45 | 36.03 | N |
| S114 | OC | 0.43 | 20 | 15 | 29 | 1.84 | 35.48 | N |
| S115 | OC | 0.71 | 21 | 12 | 32 | 1.92 | 35.24 | Y |
| S116 | BC | 0.48 | 18 | 55 | 18 | 3.62 | 34.89 | Y |
| S117 | OC | 0.31 | 22 | 14 | 30 | 2.05 | 34.23 | Y |
| S118 | OC | 0.79 | 16 | 19 | 29 | 1.93 | 34.09 | Y |
| S119 | OC | 0.65 | 23 | 13 | 25 | 1.81 | 32.95 | Y |
| S120 | BC | 0.43 | 17 | 38 | 21 | 2.78 | 32.91 | N |
| S121 | OC | 0.63 | 18 | 11 | 37 | 2.16 | 32.52 | N |
| S122 | OC | 0.44 | 17 | 6  | 51 | 2.72 | 31.84 | Y |
| S123 | OC | 0.53 | 16 | 14 | 38 | 2.34 | 31.73 | Y |
| S124 | OC | 0.68 | 15 | 14 | 32 | 1.89 | 31.71 | N |
| S125 | OC | 0.63 | 14 | 13 | 47 | 2.74 | 31.53 | N |
| S126 | OC | 0.21 | 17 | 9  | 42 | 2.37 | 31.27 | N |
| S127 | OC | 0.20 | 20 | 11 | 36 | 2.37 | 30.27 | Y |
| S128 | OC | 0.78 | 22 | 12 | 22 | 1.67 | 30.12 | N |
| S129 | OC | 0.52 | 18 | 13 | 26 | 1.80 | 29.10 | N |



|      |    |      |    |    |    |      |       |   |
|------|----|------|----|----|----|------|-------|---|
| S130 | OC | 0.67 | 19 | 12 | 27 | 1.87 | 29.02 | N |
| S131 | OC | 0.46 | 16 | 17 | 26 | 1.94 | 28.93 | N |
| S132 | OC | 0.44 | 17 | 23 | 36 | 3.06 | 28.57 | N |
| S133 | OC | 0.67 | 18 | 17 | 42 | 3.16 | 28.02 | N |
| S134 | BC | 0.40 | 14 | 28 | 17 | 2.00 | 28.00 | N |
| S135 | OC | 0.70 | 9  | 17 | 53 | 3.35 | 27.08 | N |
| S136 | OC | 0.36 | 16 | 13 | 25 | 1.75 | 26.88 | N |
| S137 | OC | 0.27 | 19 | 14 | 22 | 1.87 | 26.02 | N |
| S138 | OC | 0.40 | 16 | 11 | 43 | 2.84 | 25.98 | N |
| S139 | OC | 0.56 | 16 | 15 | 24 | 1.89 | 25.71 | N |
| S140 | OC | 0.85 | 19 | 9  | 19 | 1.41 | 25.15 | N |
| S141 | OC | 0.60 | 19 | 9  | 25 | 1.87 | 24.02 | N |
| S142 | OC | 0.46 | 14 | 13 | 37 | 2.59 | 23.86 | N |
| S143 | OC | 0.23 | 18 | 10 | 38 | 2.02 | 34.68 | Y |
| S144 | OC | 0.30 | 11 | 51 | 5  | 2.79 | 23.76 | N |
| S145 | OC | 0.78 | 14 | 14 | 26 | 1.96 | 23.62 | N |
| S146 | OC | 0.40 | 15 | 7  | 26 | 1.59 | 23.36 | N |
| S147 | OC | 0.84 | 16 | 13 | 22 | 1.80 | 23.10 | N |
| S148 | BC | 0.27 | 14 | 24 | 16 | 1.99 | 23.16 | Y |
| S149 | BC | 0.41 | 8  | 61 | 15 | 3.99 | 22.16 | N |
| S150 | OC | 0.36 | 16 | 13 | 22 | 1.90 | 21.55 | N |
| S151 | OC | 0.88 | 17 | 9  | 37 | 2.73 | 20.69 | N |
| S152 | OC | 0.42 | 16 | 11 | 26 | 2.11 | 20.30 | N |
| S153 | OC | 0.50 | 16 | 16 | 43 | 3.55 | 19.98 | N |
| S154 | BC | 0.35 | 16 | 33 | 15 | 2.92 | 18.74 | N |
| S155 | BC | 0.48 | 14 | 26 | 11 | 2.15 | 17.68 | N |
| S156 | OC | 0.41 | 15 | 16 | 37 | 3.25 | 17.63 | N |
| S157 | OC | 0.67 | 16 | 12 | 19 | 1.96 | 16.62 | N |
| S158 | BC | 0.43 | 13 | 22 | 12 | 1.97 | 16.47 | N |
| S159 | OC | 0.47 | 12 | 13 | 34 | 2.83 | 15.14 | N |
| S160 | OC | 0.86 | 15 | 7  | 19 | 1.68 | 14.96 | N |
| S161 | BC | 0.38 | 14 | 24 | 8  | 2.10 | 13.45 | N |
| S162 | OC | 0.41 | 13 | 14 | 41 | 3.52 | 13.44 | N |
| S163 | OC | 0.76 | 16 | 12 | 14 | 1.86 | 13.17 | N |
| S164 | BC | 0.36 | 16 | 18 | 6  | 1.74 | 13.03 | N |
| S165 | OC | 0.88 | 14 | 7  | 19 | 1.75 | 12.88 | N |
| S166 | OC | 0.60 | 8  | 15 | 42 | 3.38 | 12.61 | N |
| S167 | OC | 0.78 | 5  | 14 | 40 | 3.15 | 10.18 | N |
| S168 | OC | 0.25 | 15 | 10 | 19 | 2.19 | 10.06 | N |
| S169 | OC | 0.54 | 15 | 5  | 23 | 2.13 | 9.99  | N |
| S170 | OC | 0.41 | 11 | 16 | 33 | 3.23 | 9.94  | N |
| S171 | OC | 0.21 | 11 | 9  | 28 | 2.47 | 9.72  | N |
| S172 | OC | 0.77 | 5  | 6  | 31 | 2.21 | 7.75  | N |
| S173 | BC | 0.46 | 11 | 16 | 9  | 1.85 | 7.33  | N |

|      |    |      |    |    |    |      |        |   |
|------|----|------|----|----|----|------|--------|---|
| S174 | OC | 0.82 | 14 | 11 | 31 | 3.19 | 6.56   | N |
| S175 | BC | 0.20 | 13 | 12 | 19 | 2.43 | 6.34   | N |
| S176 | BC | 0.47 | 13 | 15 | 6  | 1.79 | 6.26   | N |
| S177 | OC | 0.36 | 9  | 12 | 18 | 2.15 | 5.68   | N |
| S178 | BC | 0.38 | 11 | 15 | 9  | 1.92 | 5.24   | N |
| S179 | OC | 0.71 | 6  | 9  | 41 | 3.41 | 3.15   | N |
| S180 | OC | 0.53 | 8  | 15 | 33 | 3.42 | 2.99   | N |
| S181 | OC | 0.37 | 8  | 11 | 36 | 3.40 | 2.30   | N |
| S182 | BC | 0.41 | 9  | 17 | 6  | 2.05 | 0.23   | N |
| S183 | OC | 0.64 | 7  | 12 | 28 | 3.03 | 0.04   | N |
| S184 | OC | 0.80 | 12 | 5  | 14 | 2.01 | -0.15  | N |
| S185 | OC | 0.63 | 12 | 6  | 15 | 2.17 | -0.63  | N |
| S186 | OC | 0.28 | 11 | 8  | 17 | 2.59 | -4.15  | N |
| S187 | BC | 0.32 | 7  | 16 | 4  | 2.04 | -4.62  | N |
| S188 | OC | 0.64 | 4  | 7  | 40 | 3.69 | -6.20  | N |
| S189 | BC | 0.60 | 6  | 11 | 7  | 1.98 | -6.69  | N |
| S190 | BC | 0.35 | 4  | 17 | 7  | 2.50 | -10.75 | N |
| S191 | OC | 0.35 | 6  | 4  | 8  | 1.93 | -11.92 | N |
| S192 | OC | 0.26 | 6  | 5  | 7  | 2.10 | -14.55 | Y |
| S193 | OC | 0.63 | 2  | 11 | 32 | 3.86 | -14.83 | N |
| S194 | OC | 0.77 | 3  | 3  | 4  | 2.10 | -22.55 | N |
| S195 | OC | 0.83 | 0  | 3  | 24 | 4.07 | -36.09 | N |

\*Y means that BRCA1/2 is deficient, and N means that *BRCA1/2* is intact.

Supplementary Table 4 Tumor purity and ploidy values calculated by tumor cell lines and clinical samples with different tumor purity

| ID               | purity.pdt | purity.cal | ploidy.cal | HRD Score |
|------------------|------------|------------|------------|-----------|
| HCC1143          | 0.80       | 0.83       | 3.47       | 61.27     |
|                  | 0.60       | 0.59       | 3.47       | 63.29     |
|                  | 0.50       | 0.50       | 3.44       | 61.71     |
|                  | 0.40       | 0.39       | 3.43       | 64.83     |
|                  | 0.30       | 0.29       | 3.35       | 66.02     |
|                  | 0.25       | 0.24       | 3.27       | 62.32     |
|                  | 0.20       | 0.20       | 3.31       | 54.64     |
|                  | 0.10       | 1.00       | 2.12       | -22.80    |
| HCC1428          | 0.80       | 0.80       | 3.61       | 30.97     |
|                  | 0.60       | 0.59       | 3.60       | 33.26     |
|                  | 0.50       | 0.48       | 3.59       | 32.33     |
|                  | 0.40       | 0.39       | 3.58       | 38.33     |
|                  | 0.30       | 0.29       | 3.58       | 32.39     |
|                  | 0.25       | 0.24       | 3.59       | 30.24     |
|                  | 0.20       | 0.19       | 3.44       | 24.15     |
|                  | 0.10       | 1.00       | 2.16       | -21.55    |
| HCC38            | 0.80       | 0.69       | 3.25       | 74.86     |
|                  | 0.60       | 0.57       | 3.35       | 76.10     |
|                  | 0.50       | 0.45       | 3.27       | 74.05     |
|                  | 0.40       | 0.35       | 3.29       | 70.57     |
|                  | 0.30       | 0.26       | 3.29       | 76.80     |
|                  | 0.25       | 0.22       | 3.36       | 72.26     |
|                  | 0.20       | 0.16       | 3.18       | 46.79     |
|                  | 0.10       | 1.00       | 2.00       | -29.14    |
| clinical_sample1 | 0.47       | 0.55       | 2.60       | 50.16     |
|                  | 0.31       | 0.36       | 2.60       | 47.94     |
|                  | 0.16       | 0.19       | 2.30       | 19.36     |
| clinical_sample2 | 0.44       | 0.46       | 2.90       | 2.82      |
|                  | 0.29       | 0.32       | 2.80       | 6.84      |
|                  | 0.15       | 0.20       | 2.40       | -8.38     |
| clinical_sample3 | 0.27       | 0.32       | 2.00       | 38.68     |
|                  | 0.18       | 0.20       | 2.00       | 32.09     |
|                  | 0.09       | 0.09       | 2.10       | -18.15    |
| clinical_sample4 | 0.25       | 0.29       | 3.80       | 12.19     |
|                  | 0.17       | 0.20       | 3.90       | 8.43      |
|                  | 0.08       | 0.10       | 4.00       | -7.16     |
| clinical_sample5 | 0.33       | 0.34       | 1.90       | 70.01     |
|                  | 0.22       | 0.23       | 1.80       | 69.59     |
|                  | 0.11       | 0.14       | 2.00       | -1.02     |

Supplementary Table 5 Comparison of the chromosome segmentation and copy number of GSA, PureCN, and ASCAT.

| GSA        |           |           |    |    | PureCN     |           |           |             | ASCAT      |           |           |        |        |
|------------|-----------|-----------|----|----|------------|-----------|-----------|-------------|------------|-----------|-----------|--------|--------|
| chromosome | start     | end       | nA | nB | chromosome | start     | end       | Copy number | chromosome | start     | end       | nMajor | nMinor |
| 1          | 10443     | 3683916   | 5  | 5  | 1          | 10544     | 108910866 | 3           | 1          | 10444     | 255957    | 2      | 0      |
| 1          | 3683916   | 16797479  | 2  | 2  | 1          | 110246770 | 121350186 | 3           | 1          | 534242    | 1509825   | 14     | 8      |
| 1          | 16797480  | 22451377  | 3  | 3  | 1          | 121390914 | 142728945 | 6           | 1          | 1534614   | 3683916   | 7      | 6      |
| 1          | 22451378  | 74054262  | 2  | 2  | 1          | 142811022 | 228198520 | 3           | 1          | 3686315   | 5748792   | 3      | 3      |
| 1          | 74054263  | 78149691  | 2  | 3  | 1          | 228617059 | 231790931 | 3           | 1          | 5765147   | 6695123   | 6      | 6      |
| 1          | 78149692  | 120383827 | 2  | 2  | 1          | 231790932 | 249239442 | 2           | 1          | 6700095   | 16054700  | 4      | 3      |
| 1          | 120383828 | 150059069 | 2  | 3  | 2          | 10287     | 20845260  | 3           | 1          | 16063698  | 17331676  | 9      | 6      |
| 1          | 150059069 | 164109310 | 2  | 2  | 2          | 20870815  | 89560394  | 3           | 1          | 17342924  | 33851400  | 4      | 3      |
| 1          | 164109311 | 177669266 | 1  | 2  | 2          | 91757142  | 146858894 | 3           | 1          | 33858796  | 40768552  | 3      | 3      |
| 1          | 177669267 | 201016435 | 2  | 2  | 2          | 146885790 | 240957786 | 3           | 1          | 40769415  | 45297753  | 4      | 3      |
| 1          | 201016436 | 206694171 | 2  | 3  | 3          | 105785    | 97983265  | 3           | 1          | 45307506  | 51705962  | 3      | 2      |
| 1          | 206694171 | 249239610 | 2  | 2  | 3          | 97983266  | 129279827 | 3           | 1          | 51730054  | 55418976  | 3      | 3      |
| 2          | 12990     | 75590677  | 1  | 2  | 3          | 129331896 | 183907028 | 3           | 1          | 55429134  | 55538385  | 7      | 6      |
| 2          | 75590677  | 173916192 | 2  | 2  | 3          | 184312097 | 197860922 | 2           | 1          | 55541174  | 74379335  | 3      | 2      |
| 2          | 173916193 | 177912470 | 2  | 3  | 3          | 184312097 | 197860922 | 2           | 1          | 74388971  | 77828321  | 4      | 2      |
| 2          | 177912471 | 241066575 | 2  | 2  | 4          | 10798     | 9071586   | 3           | 1          | 77840200  | 85036239  | 2      | 2      |
| 2          | 241066575 | 243184927 | 4  | 4  | 4          | 9093573   | 15004879  | 4           | 1          | 85040069  | 85746754  | 5      | 3      |
| 3          | 105785    | 22966271  | 1  | 2  | 4          | 15009222  | 69382795  | 3           | 1          | 85768379  | 109650386 | 3      | 2      |
| 3          | 22966271  | 25149971  | 1  | 3  | 4          | 70223753  | 190939656 | 3           | 1          | 109656420 | 110168888 | 6      | 4      |
| 3          | 25149971  | 31998548  | 1  | 2  | 5          | 2909107   | 42674475  | 3           | 1          | 110169957 | 110254678 | 8      | 5      |
| 3          | 31998549  | 35044116  | 1  | 3  | 5          | 42674476  | 100669673 | 3           | 1          | 110268828 | 113123734 | 3      | 3      |
| 3          | 35044117  | 64619211  | 1  | 2  | 5          | 100669674 | 180719384 | 3           | 1          | 113140583 | 113290718 | 6      | 4      |

|   |           |           |   |   |    |           |           |   |   |           |           |   |   |
|---|-----------|-----------|---|---|----|-----------|-----------|---|---|-----------|-----------|---|---|
| 3 | 64619212  | 67527113  | 1 | 3 | 6  | 183913    | 29855898  | 3 | 1 | 113310636 | 120256713 | 3 | 2 |
| 3 | 67527114  | 89232164  | 1 | 2 | 6  | 34078428  | 125368280 | 3 | 1 | 120267544 | 121449630 | 5 | 1 |
| 3 | 89232165  | 164773057 | 2 | 2 | 6  | 125368281 | 166718428 | 3 | 1 | 142540154 | 143505099 | 3 | 1 |
| 3 | 164773057 | 197861082 | 2 | 3 | 6  | 166736361 | 170978749 | 3 | 1 | 143509346 | 156206115 | 4 | 3 |
| 4 | 11870     | 3789961   | 2 | 2 | 7  | 67812     | 54497365  | 3 | 1 | 156213912 | 156909303 | 5 | 5 |
| 4 | 3789961   | 190907201 | 1 | 1 | 7  | 57698751  | 61551813  | 3 | 1 | 156914070 | 164182915 | 3 | 2 |
| 5 | 11788     | 2413820   | 2 | 6 | 7  | 61751405  | 76144500  | 3 | 1 | 164205963 | 177698891 | 2 | 1 |
| 5 | 2413820   | 45414358  | 1 | 3 | 7  | 76198922  | 84604610  | 3 | 1 | 177707062 | 185487243 | 3 | 2 |
| 5 | 50329524  | 59284115  | 1 | 1 | 7  | 88213051  | 118686043 | 3 | 1 | 185500360 | 197407942 | 2 | 2 |
| 5 | 59284116  | 64758380  | 1 | 2 | 7  | 118884560 | 141786093 | 3 | 1 | 197414077 | 200838925 | 3 | 3 |
| 5 | 64758381  | 100730500 | 1 | 1 | 7  | 143036338 | 147182357 | 3 | 1 | 200842104 | 200956288 | 7 | 6 |
| 5 | 100730501 | 137802107 | 1 | 2 | 7  | 147182358 | 159128528 | 3 | 1 | 200958111 | 201116018 | 9 | 8 |
| 5 | 137802108 | 140959743 | 2 | 2 | 8  | 10470     | 3172400   | 4 | 1 | 201122947 | 201358297 | 6 | 5 |
| 5 | 140959744 | 180719407 | 1 | 2 | 8  | 3190640   | 7222674   | 4 | 1 | 201359717 | 204397427 | 4 | 3 |
| 6 | 184125    | 122114448 | 1 | 1 | 8  | 7868986   | 11878174  | 4 | 1 | 204403659 | 205499698 | 7 | 4 |
| 6 | 122114448 | 125597537 | 1 | 2 | 8  | 12575672  | 37190826  | 4 | 1 | 205505474 | 225927179 | 2 | 2 |
| 6 | 125597537 | 171049459 | 0 | 1 | 8  | 39390215  | 115234266 | 3 | 1 | 225955919 | 227913886 | 3 | 2 |
| 7 | 34918     | 2758932   | 2 | 4 | 8  | 115240752 | 129073961 | 2 | 1 | 227920061 | 228612838 | 6 | 5 |
| 7 | 2758932   | 88774612  | 1 | 2 | 8  | 129077999 | 140789846 | 2 | 1 | 228617063 | 228699477 | 3 | 2 |
| 7 | 88774613  | 91497419  | 1 | 3 | 8  | 142021694 | 146301295 | 2 | 1 | 228714745 | 241728046 | 2 | 2 |
| 7 | 91497420  | 147891107 | 1 | 2 | 9  | 10308     | 20603357  | 3 | 1 | 241755341 | 242109146 | 5 | 2 |
| 7 | 147891108 | 159127624 | 1 | 3 | 9  | 20626651  | 28761500  | 4 | 1 | 242122950 | 249239246 | 2 | 2 |
| 8 | 11892     | 31255894  | 1 | 2 | 9  | 28761501  | 95708348  | 3 | 2 | 10437     | 3605468   | 3 | 2 |
| 8 | 31255895  | 36469972  | 1 | 1 | 9  | 96091676  | 127201626 | 3 | 2 | 3610367   | 29183332  | 3 | 1 |
| 8 | 36469973  | 39694832  | 1 | 2 | 9  | 129377847 | 141069049 | 3 | 2 | 29205451  | 29338016  | 6 | 3 |
| 8 | 39694833  | 139768085 | 2 | 2 | 10 | 2324863   | 51874242  | 3 | 2 | 29347233  | 43927509  | 2 | 1 |

|    |           |           |   |   |    |           |           |   |   |           |           |   |   |
|----|-----------|-----------|---|---|----|-----------|-----------|---|---|-----------|-----------|---|---|
| 8  | 139768085 | 142199400 | 3 | 4 | 10 | 51911792  | 69482430  | 3 | 2 | 43931321  | 44099433  | 8 | 2 |
| 8  | 142199400 | 146300855 | 5 | 5 | 10 | 69528410  | 73782236  | 3 | 2 | 44101538  | 44502788  | 9 | 2 |
| 9  | 10345     | 30951193  | 1 | 1 | 10 | 73782237  | 79370711  | 3 | 2 | 44504877  | 75590677  | 2 | 1 |
| 9  | 30951194  | 125570106 | 1 | 2 | 10 | 79403929  | 103501765 | 3 | 2 | 75612112  | 95847037  | 3 | 2 |
| 9  | 125570107 | 129864419 | 2 | 2 | 10 | 103501766 | 133218174 | 3 | 2 | 95862265  | 98413053  | 4 | 3 |
| 9  | 129864420 | 133967240 | 2 | 4 | 11 | 193151    | 3315255   | 3 | 2 | 98419726  | 113817566 | 3 | 2 |
| 9  | 133967240 | 136119809 | 1 | 2 | 11 | 3362845   | 8657322   | 4 | 2 | 113819614 | 114035194 | 4 | 4 |
| 9  | 136119809 | 141034077 | 3 | 5 | 11 | 8707150   | 15267597  | 3 | 2 | 114044377 | 120436681 | 3 | 2 |
| 10 | 135708    | 2989837   | 1 | 1 | 11 | 15267598  | 64012335  | 3 | 2 | 120438515 | 121854242 | 4 | 3 |
| 10 | 2989837   | 7063049   | 1 | 5 | 11 | 70605729  | 77069740  | 3 | 2 | 121873228 | 126322442 | 2 | 2 |
| 10 | 7063050   | 38181470  | 1 | 2 | 11 | 77111279  | 124249831 | 3 | 2 | 126335702 | 130860632 | 3 | 2 |
| 10 | 42546687  | 47006215  | 1 | 3 | 11 | 124249832 | 134946332 | 3 | 2 | 130870631 | 132302165 | 4 | 4 |
| 10 | 47006216  | 72990780  | 1 | 2 | 12 | 193817    | 9619771   | 3 | 2 | 132312325 | 173884290 | 2 | 2 |
| 10 | 72990781  | 77392753  | 2 | 5 | 12 | 9745645   | 14705349  | 3 | 2 | 173913258 | 178417225 | 3 | 3 |
| 10 | 77392754  | 103535470 | 1 | 3 | 12 | 14748352  | 24215922  | 3 | 2 | 178430747 | 216863221 | 2 | 2 |
| 10 | 103535471 | 132854084 | 2 | 3 | 12 | 26581301  | 54410000  | 3 | 2 | 216878215 | 218674353 | 4 | 3 |
| 10 | 132854084 | 135523863 | 5 | 7 | 12 | 54756526  | 133839682 | 3 | 2 | 218675144 | 220537405 | 4 | 4 |
| 11 | 193096    | 3254265   | 0 | 5 | 13 | 19365400  | 115108995 | 3 | 2 | 220543947 | 233272520 | 3 | 2 |
| 11 | 3254265   | 15287427  | 0 | 2 | 14 | 20369396  | 41602932  | 3 | 2 | 233273244 | 233410503 | 8 | 7 |
| 11 | 15287428  | 63668557  | 1 | 2 | 14 | 41676644  | 73181555  | 3 | 2 | 233415520 | 238166147 | 3 | 3 |
| 11 | 63668557  | 65906059  | 4 | 4 | 14 | 74040334  | 82491999  | 3 | 2 | 238172570 | 238503559 | 6 | 4 |
| 11 | 65906060  | 71329189  | 2 | 4 | 14 | 82503803  | 106412532 | 3 | 2 | 238509769 | 243184927 | 5 | 4 |
| 11 | 71329189  | 117054709 | 1 | 2 | 15 | 24752517  | 30432873  | 3 | 3 | 105785    | 9798006   | 2 | 1 |
| 11 | 117054709 | 120387112 | 2 | 3 | 15 | 30889846  | 93588316  | 3 | 3 | 9798767   | 9991369   | 4 | 3 |
| 11 | 120387112 | 134946381 | 1 | 2 | 15 | 93616927  | 102431165 | 3 | 3 | 10015437  | 12854616  | 2 | 1 |
| 12 | 193817    | 44325870  | 1 | 2 | 16 | 2998646   | 32096230  | 3 | 3 | 12856856  | 13726888  | 4 | 2 |

|    |           |           |   |   |    |          |          |   |   |           |           |   |   |
|----|-----------|-----------|---|---|----|----------|----------|---|---|-----------|-----------|---|---|
| 12 | 44325871  | 52856128  | 1 | 3 | 16 | 33839127 | 55778841 | 3 | 3 | 13734613  | 23503506  | 2 | 1 |
| 12 | 52856129  | 69518950  | 1 | 2 | 16 | 55832532 | 90171440 | 3 | 3 | 23511338  | 24830136  | 3 | 1 |
| 12 | 69518950  | 72779820  | 2 | 3 | 17 | 301      | 15039064 | 3 | 3 | 24838218  | 31981493  | 2 | 1 |
| 12 | 72779820  | 130897316 | 1 | 2 | 17 | 18221011 | 21982191 | 3 | 3 | 32001641  | 35035432  | 4 | 1 |
| 12 | 130897316 | 133840496 | 2 | 3 | 17 | 21982192 | 26633385 | 3 | 3 | 35045130  | 38034821  | 2 | 1 |
| 13 | 19149491  | 35918811  | 1 | 2 | 17 | 27816679 | 36211682 | 3 | 3 | 38035508  | 38793940  | 3 | 2 |
| 13 | 35918812  | 38039200  | 1 | 3 | 17 | 38140545 | 45490251 | 3 | 3 | 38802251  | 48384721  | 2 | 1 |
| 13 | 38039200  | 97966870  | 1 | 2 | 17 | 45490252 | 81050912 | 3 | 3 | 48393556  | 48678011  | 5 | 3 |
| 13 | 97966871  | 100749907 | 1 | 3 | 18 | 10718    | 77674628 | 4 | 3 | 48678971  | 48723302  | 7 | 4 |
| 13 | 100749908 | 115104231 | 1 | 2 | 19 | 844021   | 14924875 | 3 | 3 | 48727112  | 49928691  | 3 | 1 |
| 14 | 19066305  | 104518453 | 1 | 2 | 19 | 24487371 | 38793310 | 2 | 3 | 49936102  | 50645793  | 7 | 3 |
| 14 | 104518453 | 107289541 | 2 | 4 | 19 | 41104875 | 57804362 | 3 | 3 | 50647888  | 51697493  | 2 | 1 |
| 15 | 20119124  | 95416418  | 1 | 1 | 20 | 76963    | 9806342  | 3 | 3 | 51737965  | 52512318  | 4 | 2 |
| 15 | 95416419  | 102520957 | 1 | 2 | 20 | 9836329  | 26072253 | 3 | 3 | 52521921  | 52584424  | 7 | 4 |
| 16 | 103517    | 5196763   | 2 | 2 | 20 | 26278201 | 29652157 | 4 | 3 | 52584715  | 53277645  | 3 | 2 |
| 16 | 5196763   | 28336882  | 1 | 1 | 20 | 29809688 | 33585427 | 3 | 3 | 53293157  | 65306638  | 2 | 1 |
| 16 | 28336882  | 33965813  | 2 | 2 | 20 | 33591112 | 38747958 | 3 | 3 | 65311745  | 67425983  | 4 | 1 |
| 16 | 33965813  | 69525862  | 1 | 1 | 20 | 39998485 | 52169749 | 2 | 3 | 67431071  | 88916705  | 2 | 1 |
| 16 | 69525862  | 72832651  | 0 | 2 | 20 | 55892520 | 62916447 | 2 | 3 | 88926656  | 123005476 | 3 | 2 |
| 16 | 72832651  | 87518783  | 1 | 1 | 21 | 9527025  | 14572806 | 4 | 3 | 123010363 | 123135244 | 5 | 5 |
| 16 | 87518783  | 90230101  | 2 | 2 | 21 | 14578435 | 40683477 | 3 | 3 | 123152897 | 123419733 | 5 | 4 |
| 17 | 2037      | 8851027   | 0 | 3 | 21 | 40712373 | 48118698 | 3 | 3 | 123440967 | 123457711 | 8 | 7 |
| 17 | 8851027   | 33194247  | 0 | 2 | 22 | 24681539 | 30638282 | 3 | 3 | 123479778 | 125962089 | 3 | 2 |
| 17 | 33194248  | 45664593  | 0 | 1 | 22 | 30802434 | 51243277 | 3 | 3 | 125975564 | 129349136 | 4 | 4 |
| 17 | 45664593  | 48761099  | 1 | 3 |    |          |          |   | 3 | 129364254 | 147066494 | 3 | 2 |
| 17 | 48761099  | 69119481  | 1 | 2 |    |          |          |   | 3 | 147076030 | 147599269 | 4 | 4 |

|    |          |          |   |   |
|----|----------|----------|---|---|
| 17 | 69119481 | 78765219 | 2 | 4 |
| 17 | 78765219 | 81194987 | 2 | 5 |
| 18 | 10813    | 78017073 | 0 | 2 |
| 19 | 282747   | 4818373  | 0 | 2 |
| 19 | 4818373  | 14231330 | 2 | 6 |
| 19 | 14231330 | 17296679 | 1 | 2 |
| 19 | 17296679 | 20184274 | 2 | 4 |
| 19 | 20184274 | 22482889 | 1 | 4 |
| 19 | 22482890 | 38604588 | 1 | 1 |
| 19 | 38604588 | 41284394 | 2 | 2 |
| 19 | 41284394 | 48785642 | 1 | 4 |
| 19 | 48785642 | 56767042 | 2 | 4 |
| 19 | 56767042 | 59118886 | 1 | 2 |
| 20 | 76962    | 25041159 | 2 | 2 |
| 20 | 30273552 | 49774398 | 2 | 2 |
| 20 | 49774399 | 53291424 | 2 | 4 |
| 20 | 53291425 | 56433748 | 2 | 3 |
| 20 | 56433749 | 60180124 | 2 | 2 |
| 20 | 60180124 | 62958710 | 4 | 4 |
| 21 | 9527088  | 32935103 | 2 | 2 |
| 21 | 32935103 | 35506430 | 2 | 3 |
| 21 | 35506430 | 43852421 | 2 | 2 |
| 21 | 43852422 | 48104004 | 4 | 4 |
| 22 | 16870802 | 24655659 | 0 | 3 |
| 22 | 24655659 | 28604583 | 0 | 2 |
| 22 | 28604583 | 31438928 | 0 | 4 |

|   |           |           |   |   |
|---|-----------|-----------|---|---|
| 3 | 147623909 | 164764719 | 2 | 2 |
| 3 | 164773057 | 175513789 | 4 | 3 |
| 3 | 175520406 | 183907032 | 3 | 3 |
| 3 | 183914759 | 184311940 | 7 | 7 |
| 3 | 184320458 | 184485565 | 5 | 4 |
| 3 | 184492965 | 193798407 | 3 | 3 |
| 3 | 193807621 | 197861082 | 5 | 4 |
| 4 | 10798     | 515489    | 1 | 1 |
| 4 | 515844    | 2074700   | 3 | 2 |
| 4 | 2087202   | 2307960   | 1 | 1 |
| 4 | 2330889   | 3789961   | 2 | 1 |
| 4 | 3798866   | 6525332   | 1 | 1 |
| 4 | 6532811   | 9022171   | 2 | 1 |
| 4 | 9032235   | 190939879 | 1 | 0 |
| 5 | 12114     | 14104     | 9 | 0 |
| 5 | 14757     | 49851     | 3 | 1 |
| 5 | 50708     | 1889840   | 8 | 3 |
| 5 | 1902586   | 42779736  | 3 | 1 |
| 5 | 42782492  | 43855368  | 4 | 3 |
| 5 | 43927178  | 45387846  | 3 | 1 |
| 5 | 45406321  | 49505838  | 2 | 1 |
| 5 | 49522346  | 59277134  | 1 | 0 |
| 5 | 59286205  | 64693317  | 2 | 1 |
| 5 | 64725524  | 79238533  | 1 | 0 |
| 5 | 79252182  | 79617357  | 2 | 1 |
| 5 | 79621016  | 94259610  | 1 | 0 |



|    |          |          |   |   |
|----|----------|----------|---|---|
| 22 | 31438928 | 51183255 | 0 | 2 |
|----|----------|----------|---|---|

|   |           |           |   |   |
|---|-----------|-----------|---|---|
| 5 | 94278129  | 94528491  | 2 | 1 |
| 5 | 94550971  | 100753611 | 1 | 0 |
| 5 | 100765147 | 138487483 | 2 | 1 |
| 5 | 138494690 | 138705812 | 2 | 2 |
| 5 | 138713959 | 141335241 | 4 | 3 |
| 5 | 141336264 | 148152364 | 2 | 1 |
| 5 | 148164206 | 148581063 | 6 | 2 |
| 5 | 148610276 | 149431259 | 3 | 1 |
| 5 | 149433596 | 150158164 | 4 | 2 |
| 5 | 150164243 | 167653394 | 2 | 1 |
| 5 | 167674363 | 168634740 | 6 | 2 |
| 5 | 168671698 | 175956516 | 2 | 1 |
| 5 | 175956516 | 176148768 | 6 | 3 |
| 5 | 176165086 | 180719407 | 4 | 2 |
| 6 | 184125    | 25918688  | 1 | 0 |
| 6 | 25944103  | 33272712  | 1 | 1 |
| 6 | 33280505  | 34110254  | 2 | 1 |
| 6 | 34124370  | 44691371  | 1 | 1 |
| 6 | 44698708  | 90565234  | 1 | 0 |
| 6 | 90572196  | 91204213  | 2 | 1 |
| 6 | 91225132  | 98280013  | 1 | 0 |
| 6 | 98300239  | 98749236  | 2 | 1 |
| 6 | 98771028  | 122605510 | 1 | 0 |
| 6 | 122617158 | 124201918 | 2 | 1 |
| 6 | 124204860 | 125572968 | 4 | 1 |
| 6 | 125597537 | 166554170 | 0 | 0 |

|   |           |           |    |   |
|---|-----------|-----------|----|---|
| 6 | 166572045 | 171050287 | 1  | 0 |
| 7 | 16165     | 2458380   | 5  | 2 |
| 7 | 2472707   | 3117838   | 7  | 3 |
| 7 | 3127215   | 5239360   | 3  | 1 |
| 7 | 5254227   | 5686704   | 6  | 3 |
| 7 | 5696125   | 6870635   | 3  | 1 |
| 7 | 6878096   | 43846603  | 2  | 1 |
| 7 | 43851539  | 45257233  | 4  | 2 |
| 7 | 45273264  | 54133053  | 2  | 1 |
| 7 | 54142421  | 54689570  | 2  | 2 |
| 7 | 54711985  | 72286028  | 2  | 1 |
| 7 | 72300323  | 72891754  | 3  | 2 |
| 7 | 72898228  | 72934078  | 3  | 0 |
| 7 | 72944370  | 76162076  | 4  | 2 |
| 7 | 76173536  | 89563399  | 2  | 1 |
| 7 | 89574638  | 91443183  | 4  | 1 |
| 7 | 91464218  | 98990416  | 2  | 1 |
| 7 | 99017733  | 102312228 | 3  | 2 |
| 7 | 102332448 | 147821399 | 2  | 1 |
| 7 | 147839308 | 149321637 | 4  | 2 |
| 7 | 149334780 | 149523584 | 11 | 4 |
| 7 | 149528146 | 149576819 | 10 | 4 |
| 7 | 149589663 | 159128605 | 5  | 2 |
| 8 | 10470     | 2226147   | 3  | 1 |
| 8 | 2239128   | 10438796  | 2  | 1 |
| 8 | 10448836  | 10649192  | 5  | 3 |

|   |           |           |   |   |
|---|-----------|-----------|---|---|
| 8 | 10656437  | 16059915  | 2 | 1 |
| 8 | 16066975  | 17581155  | 3 | 1 |
| 8 | 17581700  | 19221650  | 2 | 1 |
| 8 | 19237079  | 20110641  | 3 | 2 |
| 8 | 20120297  | 21862551  | 2 | 1 |
| 8 | 21862551  | 23290439  | 4 | 2 |
| 8 | 23291833  | 25460335  | 2 | 1 |
| 8 | 25481266  | 26988103  | 1 | 0 |
| 8 | 27001935  | 31352513  | 2 | 1 |
| 8 | 31388393  | 35916718  | 1 | 0 |
| 8 | 35922774  | 39685594  | 2 | 1 |
| 8 | 39694860  | 43763025  | 3 | 2 |
| 8 | 43776238  | 47346329  | 4 | 4 |
| 8 | 47357126  | 84030205  | 2 | 2 |
| 8 | 84038956  | 123445622 | 3 | 2 |
| 8 | 123465838 | 140611843 | 3 | 3 |
| 8 | 140630990 | 142129925 | 7 | 4 |
| 8 | 142138860 | 145921475 | 9 | 8 |
| 8 | 145933692 | 146301381 | 4 | 3 |
| 9 | 10345     | 57539     | 2 | 1 |
| 9 | 58033     | 31146953  | 1 | 0 |
| 9 | 31164389  | 95826971  | 2 | 1 |
| 9 | 95840344  | 96060759  | 6 | 3 |
| 9 | 96072783  | 116741937 | 2 | 1 |
| 9 | 116751005 | 117195760 | 5 | 3 |
| 9 | 117203632 | 125840164 | 2 | 1 |

|    |           |           |    |   |
|----|-----------|-----------|----|---|
| 9  | 125848900 | 129551392 | 3  | 3 |
| 9  | 129558047 | 130210946 | 3  | 1 |
| 9  | 130213298 | 134530107 | 4  | 2 |
| 9  | 134541216 | 135841425 | 2  | 1 |
| 9  | 135861993 | 141069049 | 5  | 3 |
| 10 | 135708    | 1782394   | 1  | 1 |
| 10 | 1795194   | 3009351   | 1  | 0 |
| 10 | 3022248   | 3188071   | 15 | 4 |
| 10 | 3189380   | 6881554   | 8  | 2 |
| 10 | 6900363   | 38958568  | 2  | 1 |
| 10 | 38968721  | 42517060  | 3  | 1 |
| 10 | 42607765  | 47738963  | 5  | 2 |
| 10 | 47898043  | 71119003  | 2  | 1 |
| 10 | 71129194  | 73439101  | 3  | 2 |
| 10 | 73454637  | 73579217  | 6  | 3 |
| 10 | 73581560  | 73782236  | 3  | 1 |
| 10 | 73790819  | 77359185  | 7  | 2 |
| 10 | 77370319  | 80898955  | 4  | 1 |
| 10 | 80912499  | 81198212  | 7  | 3 |
| 10 | 81212704  | 92791385  | 4  | 1 |
| 10 | 92806230  | 96163034  | 6  | 2 |
| 10 | 96176376  | 103501914 | 4  | 1 |
| 10 | 103510619 | 110903958 | 4  | 4 |
| 10 | 110913556 | 111946947 | 4  | 1 |
| 10 | 111956363 | 133482891 | 4  | 4 |
| 10 | 133503598 | 135279810 | 10 | 9 |

|    |           |           |   |   |
|----|-----------|-----------|---|---|
| 10 | 135280765 | 135523863 | 7 | 2 |
| 11 | 193096    | 279786    | 3 | 1 |
| 11 | 280216    | 1961869   | 5 | 0 |
| 11 | 1971977   | 2073490   | 9 | 0 |
| 11 | 2094852   | 2436733   | 8 | 0 |
| 11 | 2439621   | 2441646   | 9 | 0 |
| 11 | 2443938   | 3254265   | 4 | 0 |
| 11 | 3260222   | 15282156  | 2 | 0 |
| 11 | 15301762  | 60504476  | 2 | 1 |
| 11 | 60508999  | 64039162  | 3 | 2 |
| 11 | 64053595  | 65617110  | 7 | 6 |
| 11 | 65623524  | 70517927  | 4 | 2 |
| 11 | 70523008  | 75852448  | 3 | 1 |
| 11 | 75860179  | 76924874  | 4 | 2 |
| 11 | 76928149  | 77814045  | 3 | 1 |
| 11 | 77815188  | 102587062 | 2 | 1 |
| 11 | 102593248 | 102870940 | 2 | 2 |
| 11 | 102884896 | 116634173 | 2 | 1 |
| 11 | 116643610 | 118472349 | 3 | 2 |
| 11 | 118478407 | 118604837 | 5 | 3 |
| 11 | 118626511 | 118757219 | 3 | 2 |
| 11 | 118757219 | 120151774 | 6 | 3 |
| 11 | 120161671 | 125714088 | 2 | 1 |
| 11 | 125747537 | 125986274 | 3 | 3 |
| 11 | 125998594 | 126232422 | 4 | 4 |
| 11 | 126242546 | 126404639 | 6 | 5 |

|    |           |           |   |   |
|----|-----------|-----------|---|---|
| 11 | 126411459 | 134946318 | 2 | 1 |
| 12 | 193817    | 907310    | 3 | 2 |
| 12 | 928911    | 6422272   | 2 | 1 |
| 12 | 6422988   | 7287914   | 4 | 2 |
| 12 | 7290200   | 44604028  | 2 | 1 |
| 12 | 44613070  | 48920006  | 4 | 1 |
| 12 | 48925862  | 50480232  | 3 | 1 |
| 12 | 50480314  | 52204246  | 2 | 1 |
| 12 | 52215102  | 53822992  | 4 | 2 |
| 12 | 53825325  | 57559809  | 2 | 1 |
| 12 | 57567180  | 57591458  | 7 | 4 |
| 12 | 57591458  | 57637593  | 6 | 3 |
| 12 | 57640620  | 69654187  | 2 | 1 |
| 12 | 69667075  | 70679929  | 3 | 3 |
| 12 | 70690194  | 72203204  | 3 | 1 |
| 12 | 72226611  | 113369644 | 2 | 1 |
| 12 | 113376452 | 113996719 | 4 | 4 |
| 12 | 114005404 | 120443494 | 2 | 1 |
| 12 | 120455954 | 121202362 | 6 | 2 |
| 12 | 121202952 | 122692820 | 3 | 2 |
| 12 | 122701001 | 124777480 | 1 | 1 |
| 12 | 124787539 | 125621419 | 3 | 2 |
| 12 | 125626535 | 131455442 | 2 | 1 |
| 12 | 131462375 | 132505406 | 4 | 2 |
| 12 | 132508389 | 133464490 | 7 | 7 |
| 12 | 133488904 | 133841396 | 3 | 2 |

|    |           |           |   |   |
|----|-----------|-----------|---|---|
| 13 | 19110523  | 35933714  | 2 | 1 |
| 13 | 35955344  | 37915301  | 4 | 1 |
| 13 | 37925269  | 98218375  | 2 | 1 |
| 13 | 98234789  | 100804923 | 4 | 2 |
| 13 | 100807376 | 110759711 | 2 | 1 |
| 13 | 110770593 | 113411956 | 3 | 2 |
| 13 | 113421845 | 115108995 | 5 | 3 |
| 14 | 19066305  | 24437922  | 2 | 1 |
| 14 | 24454989  | 25008758  | 4 | 2 |
| 14 | 25026780  | 34014124  | 2 | 1 |
| 14 | 34020584  | 35019099  | 3 | 1 |
| 14 | 35032112  | 99659371  | 2 | 1 |
| 14 | 99669020  | 104554044 | 3 | 2 |
| 14 | 104559552 | 106404410 | 5 | 3 |
| 14 | 106412532 | 107289541 | 2 | 1 |
| 15 | 20060562  | 40329520  | 1 | 0 |
| 15 | 40330693  | 42083843  | 1 | 1 |
| 15 | 42104339  | 42226255  | 3 | 2 |
| 15 | 42233908  | 42431236  | 2 | 1 |
| 15 | 42433382  | 42448658  | 3 | 2 |
| 15 | 42453954  | 90170232  | 1 | 1 |
| 15 | 90172832  | 90352611  | 3 | 2 |
| 15 | 90369148  | 95706135  | 1 | 1 |
| 15 | 95712020  | 97706696  | 2 | 1 |
| 15 | 97712183  | 97875116  | 1 | 0 |
| 15 | 97888564  | 101162066 | 1 | 1 |

|    |           |           |   |   |
|----|-----------|-----------|---|---|
| 15 | 101172258 | 102520957 | 3 | 1 |
| 16 | 97583     | 3170188   | 3 | 2 |
| 16 | 3173575   | 4356193   | 1 | 1 |
| 16 | 4367492   | 5223036   | 2 | 2 |
| 16 | 5247799   | 11203558  | 1 | 0 |
| 16 | 11225515  | 11607076  | 2 | 2 |
| 16 | 11618256  | 27751757  | 1 | 1 |
| 16 | 27761631  | 29814234  | 2 | 1 |
| 16 | 29818850  | 30134251  | 5 | 3 |
| 16 | 30147265  | 35213861  | 2 | 1 |
| 16 | 46438402  | 56899547  | 1 | 1 |
| 16 | 56901288  | 58079157  | 2 | 1 |
| 16 | 58092093  | 66240435  | 1 | 0 |
| 16 | 66246688  | 70624483  | 1 | 1 |
| 16 | 70630077  | 71174927  | 2 | 1 |
| 16 | 71188623  | 83949853  | 1 | 1 |
| 16 | 83953124  | 84211465  | 2 | 1 |
| 16 | 84212571  | 84270741  | 3 | 3 |
| 16 | 84296118  | 87349529  | 1 | 1 |
| 16 | 87350773  | 90292760  | 2 | 2 |
| 17 | 301       | 9846633   | 3 | 0 |
| 17 | 9856734   | 16321029  | 1 | 0 |
| 17 | 16322676  | 18286762  | 3 | 0 |
| 17 | 18314913  | 21195039  | 2 | 0 |
| 17 | 21198799  | 21321955  | 5 | 1 |
| 17 | 21356435  | 33502973  | 2 | 0 |



|    |          |          |    |   |
|----|----------|----------|----|---|
| 17 | 33504465 | 36614524 | 0  | 0 |
| 17 | 36617210 | 37558900 | 2  | 0 |
| 17 | 37561613 | 45745468 | 1  | 0 |
| 17 | 45750462 | 48834023 | 4  | 2 |
| 17 | 48843437 | 69919968 | 2  | 1 |
| 17 | 69928346 | 71189182 | 6  | 2 |
| 17 | 71192873 | 72710796 | 3  | 2 |
| 17 | 72733082 | 78846909 | 4  | 2 |
| 17 | 78854377 | 81194987 | 6  | 3 |
| 18 | 10813    | 52294    | 4  | 0 |
| 18 | 52880    | 76951258 | 1  | 0 |
| 18 | 76961923 | 78017073 | 2  | 0 |
| 19 | 266023   | 4844149  | 2  | 0 |
| 19 | 4847874  | 5307420  | 24 | 5 |
| 19 | 5320087  | 7431287  | 8  | 2 |
| 19 | 7437583  | 8675108  | 28 | 5 |
| 19 | 8741614  | 10057878 | 6  | 1 |
| 19 | 10070954 | 10265312 | 3  | 2 |
| 19 | 10267266 | 14200930 | 8  | 2 |
| 19 | 14231330 | 14412411 | 3  | 1 |
| 19 | 14425502 | 17396549 | 3  | 2 |
| 19 | 17397479 | 17655505 | 11 | 4 |
| 19 | 17660300 | 18119418 | 4  | 2 |
| 19 | 18119744 | 18174729 | 5  | 3 |
| 19 | 18180447 | 18950636 | 9  | 3 |
| 19 | 18956698 | 20913512 | 3  | 2 |

|    |          |          |    |   |
|----|----------|----------|----|---|
| 19 | 20918419 | 22559123 | 6  | 2 |
| 19 | 22585517 | 33044716 | 1  | 0 |
| 19 | 33054934 | 36038390 | 1  | 1 |
| 19 | 36041030 | 36259467 | 2  | 2 |
| 19 | 36266776 | 36643483 | 4  | 2 |
| 19 | 36667932 | 37397596 | 1  | 1 |
| 19 | 37399404 | 38109777 | 1  | 0 |
| 19 | 38127250 | 41497280 | 2  | 1 |
| 19 | 41510102 | 43237759 | 6  | 2 |
| 19 | 43243218 | 45253101 | 5  | 2 |
| 19 | 45287674 | 45911320 | 11 | 7 |
| 19 | 45912000 | 48692874 | 5  | 2 |
| 19 | 48697961 | 48785642 | 3  | 1 |
| 19 | 48800299 | 49132634 | 12 | 5 |
| 19 | 49133761 | 49141532 | 7  | 3 |
| 19 | 49143025 | 49206603 | 8  | 4 |
| 19 | 49214748 | 51455556 | 6  | 3 |
| 19 | 51463845 | 54314585 | 7  | 2 |
| 19 | 54327568 | 55879872 | 4  | 2 |
| 19 | 55895579 | 56215171 | 26 | 7 |
| 19 | 56220504 | 56717353 | 6  | 2 |
| 19 | 56717353 | 58858224 | 2  | 1 |
| 19 | 58858676 | 59118886 | 6  | 2 |
| 20 | 76962    | 2728558  | 4  | 3 |
| 20 | 2730400  | 3236015  | 7  | 6 |
| 20 | 3245006  | 3629686  | 3  | 2 |

|    |          |          |   |   |
|----|----------|----------|---|---|
| 20 | 3640467  | 3684022  | 9 | 8 |
| 20 | 3686436  | 3911270  | 6 | 5 |
| 20 | 3917072  | 24923660 | 3 | 2 |
| 20 | 24929947 | 25865400 | 4 | 4 |
| 20 | 25873122 | 30870339 | 5 | 3 |
| 20 | 30887184 | 33551218 | 4 | 3 |
| 20 | 33565480 | 33592474 | 9 | 9 |
| 20 | 33593674 | 43933163 | 3 | 2 |
| 20 | 43942676 | 44691350 | 5 | 4 |
| 20 | 44697431 | 47606043 | 3 | 3 |
| 20 | 47626847 | 47919672 | 5 | 3 |
| 20 | 47935629 | 50177662 | 3 | 3 |
| 20 | 50182797 | 53268372 | 7 | 4 |
| 20 | 53276418 | 55955567 | 5 | 3 |
| 20 | 55969697 | 56412867 | 7 | 5 |
| 20 | 56420820 | 60180124 | 3 | 3 |
| 20 | 60183964 | 62961724 | 7 | 6 |
| 21 | 9527088  | 14703726 | 4 | 2 |
| 21 | 14716293 | 33057344 | 2 | 2 |
| 21 | 33069118 | 35531416 | 4 | 3 |
| 21 | 35543613 | 39899525 | 3 | 2 |
| 21 | 39912560 | 42938226 | 4 | 3 |
| 21 | 42942620 | 45096206 | 5 | 4 |
| 21 | 45107518 | 47639492 | 7 | 6 |
| 21 | 47641700 | 48118698 | 4 | 4 |
| 22 | 16870802 | 18859378 | 4 | 0 |

|    |          |          |   |   |
|----|----------|----------|---|---|
| 22 | 18894046 | 20311131 | 7 | 0 |
| 22 | 20353879 | 22049783 | 4 | 0 |
| 22 | 22053880 | 28586674 | 2 | 0 |
| 22 | 28604583 | 31535995 | 4 | 0 |
| 22 | 31552702 | 37260123 | 2 | 0 |
| 22 | 37268257 | 38485064 | 4 | 0 |
| 22 | 38486738 | 50058338 | 2 | 0 |
| 22 | 50085205 | 51243277 | 1 | 0 |

---

Supplementary Table 6 Comparison of the tumor purity and ploidy predicted by GSA, PureCN, and ASCAT.

| ID               | purity.pdt | GSA        |            | PureCN     |            | ASCAT      |            |
|------------------|------------|------------|------------|------------|------------|------------|------------|
|                  |            | purity.cal | ploidy.cal | purity.cal | ploidy.cal | purity.cal | ploidy.cal |
| HCC1143          | 0.8        | 0.83       | 3.47       | 0.84       | 3.62       | 0.8        | 3.91       |
|                  | 0.6        | 0.59       | 3.47       | 0.62       | 3.66       | 0.65       | 3.85       |
|                  | 0.5        | 0.5        | 3.44       | 0.5        | 3.66       | 0.61       | 3.17       |
|                  | 0.4        | 0.39       | 3.43       | 0.45       | 3.59       | 0.53       | 3.03       |
|                  | 0.3        | 0.29       | 3.35       | 0.32       | 3.71       | NA         | NA         |
|                  | 0.25       | 0.24       | 3.27       | 0.32       | 2.2        | NA         | NA         |
|                  | 0.2        | 0.2        | 3.31       | 0.32       | 2.25       | NA         | NA         |
|                  | 0.1        | NA         | NA         | 0.2        | 2.31       | NA         | NA         |
| HCC1428          | 0.8        | 0.8        | 3.61       | 0.88       | 3.63       | 0.98       | 3.79       |
|                  | 0.6        | 0.59       | 3.6        | 0.6        | 3.63       | 0.72       | 3.88       |
|                  | 0.5        | 0.48       | 3.59       | 0.49       | 3.63       | 0.64       | 3.66       |
|                  | 0.4        | 0.39       | 3.58       | 0.4        | 3.66       | NA         | NA         |
|                  | 0.3        | 0.29       | 3.58       | 0.37       | 1.9        | NA         | NA         |
|                  | 0.25       | 0.24       | 3.59       | 0.27       | 2.05       | NA         | NA         |
|                  | 0.2        | 0.19       | 3.44       | 0.21       | 2.1        | NA         | NA         |
|                  | 0.1        | NA         | NA         | 0.15       | 1.78       | NA         | NA         |
| HCC38            | 0.8        | 0.69       | 3.25       | 0.71       | 3.39       | 0.83       | 2.52       |
|                  | 0.6        | 0.57       | 3.35       | 0.56       | 3.4        | 0.69       | 3.05       |
|                  | 0.5        | 0.45       | 3.27       | 0.44       | 2.48       | 0.61       | 2.74       |
|                  | 0.4        | 0.35       | 3.29       | 0.41       | 3.44       | 0.47       | 3.16       |
|                  | 0.3        | 0.26       | 3.29       | 0.32       | 2.59       | NA         | NA         |
|                  | 0.25       | 0.22       | 3.36       | 0.32       | 2.29       | NA         | NA         |
|                  | 0.2        | 0.16       | 3.18       | 0.15       | 1.9        | NA         | NA         |
|                  | 0.1        | NA         | NA         | 0.15       | 2.06       | NA         | NA         |
| clinical_sample1 | 0.74       | 0.74       | 3.00       | 0.80       | 3.18       | 0.87       | 3.65       |
|                  | 0.44       | 0.46       | 2.90       | 0.50       | 3.18       | 0.58       | 3.14       |
|                  | 0.29       | 0.32       | 2.80       | 0.33       | 3.21       | 0.45       | 2.35       |
|                  | 0.15       | 0.20       | 2.40       | 0.17       | 2.31       | NA         | 2.08       |
| clinical_sample2 | 0.45       | 0.45       | 2.00       | 0.46       | 2.17       | 0.65       | 1.84       |
|                  | 0.27       | 0.32       | 2.00       | 0.32       | 2.15       | 0.48       | 1.67       |
|                  | 0.18       | 0.20       | 2.00       | 0.22       | 2.17       | NA         | 2.21       |
|                  | 0.09       | NA         | NA         | 0.15       | 2.12       | NA         | 4.19       |
| clinical_sample3 | 0.42       | 0.42       | 3.90       | 0.52       | 4.26       | NA         | NA         |
|                  | 0.25       | 0.29       | 3.80       | 0.39       | 4.19       | NA         | NA         |
|                  | 0.17       | 0.20       | 3.90       | 0.34       | 3.88       | NA         | NA         |
|                  | 0.08       | NA         | NA         | 0.22       | 3.81       | NA         | NA         |
| clinical_sample4 | 0.54       | 0.54       | 1.90       | 0.45       | 2.04       | 0.64       | 1.44       |
|                  | 0.33       | 0.34       | 1.90       | 0.31       | 2.02       | 0.97       | 3.19       |
|                  | 0.22       | 0.23       | 1.80       | 0.22       | 2.05       | NA         | 2.37       |

0.11

NA

NA

0.15

2.03

NA

4.26

---
